# Supplementary material
Source: Springer Nature journal article supplement (https://www.springermedizin.de/resource/supplementary/12889_2012_5024_MOESM1_ESM.pdf/9493224)
Supplement: MOESM1 [file 9493224]

**34,430** Computer generated residential telephone numbers

**2,863** Included

**31,567** Excluded

**828** Refused

**492** Partially completed

**1,543** Successful  
completion (53.9%)

**23,624** Unassigned, business  
or fax/data numbers

**7,820** No answer, busy, not  
available

**123** Ineligible, language, or  
communication problems
